# Supplementary material for: Chromosome-autonomous feedback down-regulates meiotic DNA break competence upon synaptonemal complex formation
Source: PubMed Central journal article supplement (PMC7706706; doi:10.1101/gad.342873.120), 2020-12-01
Supplement: supp_gad.342873.120_Supplemental_material.pdf [file supp_gad.342873.120_Supplemental_material.pdf]

**Supplemental material for:**

**Chromosome-autonomous feedback downregulates meiotic DNA  
break competence upon synaptonemal complex formation**

Xiaojing Mu, Hajime Murakami, Neeman Mohibullah and Scott Keeney

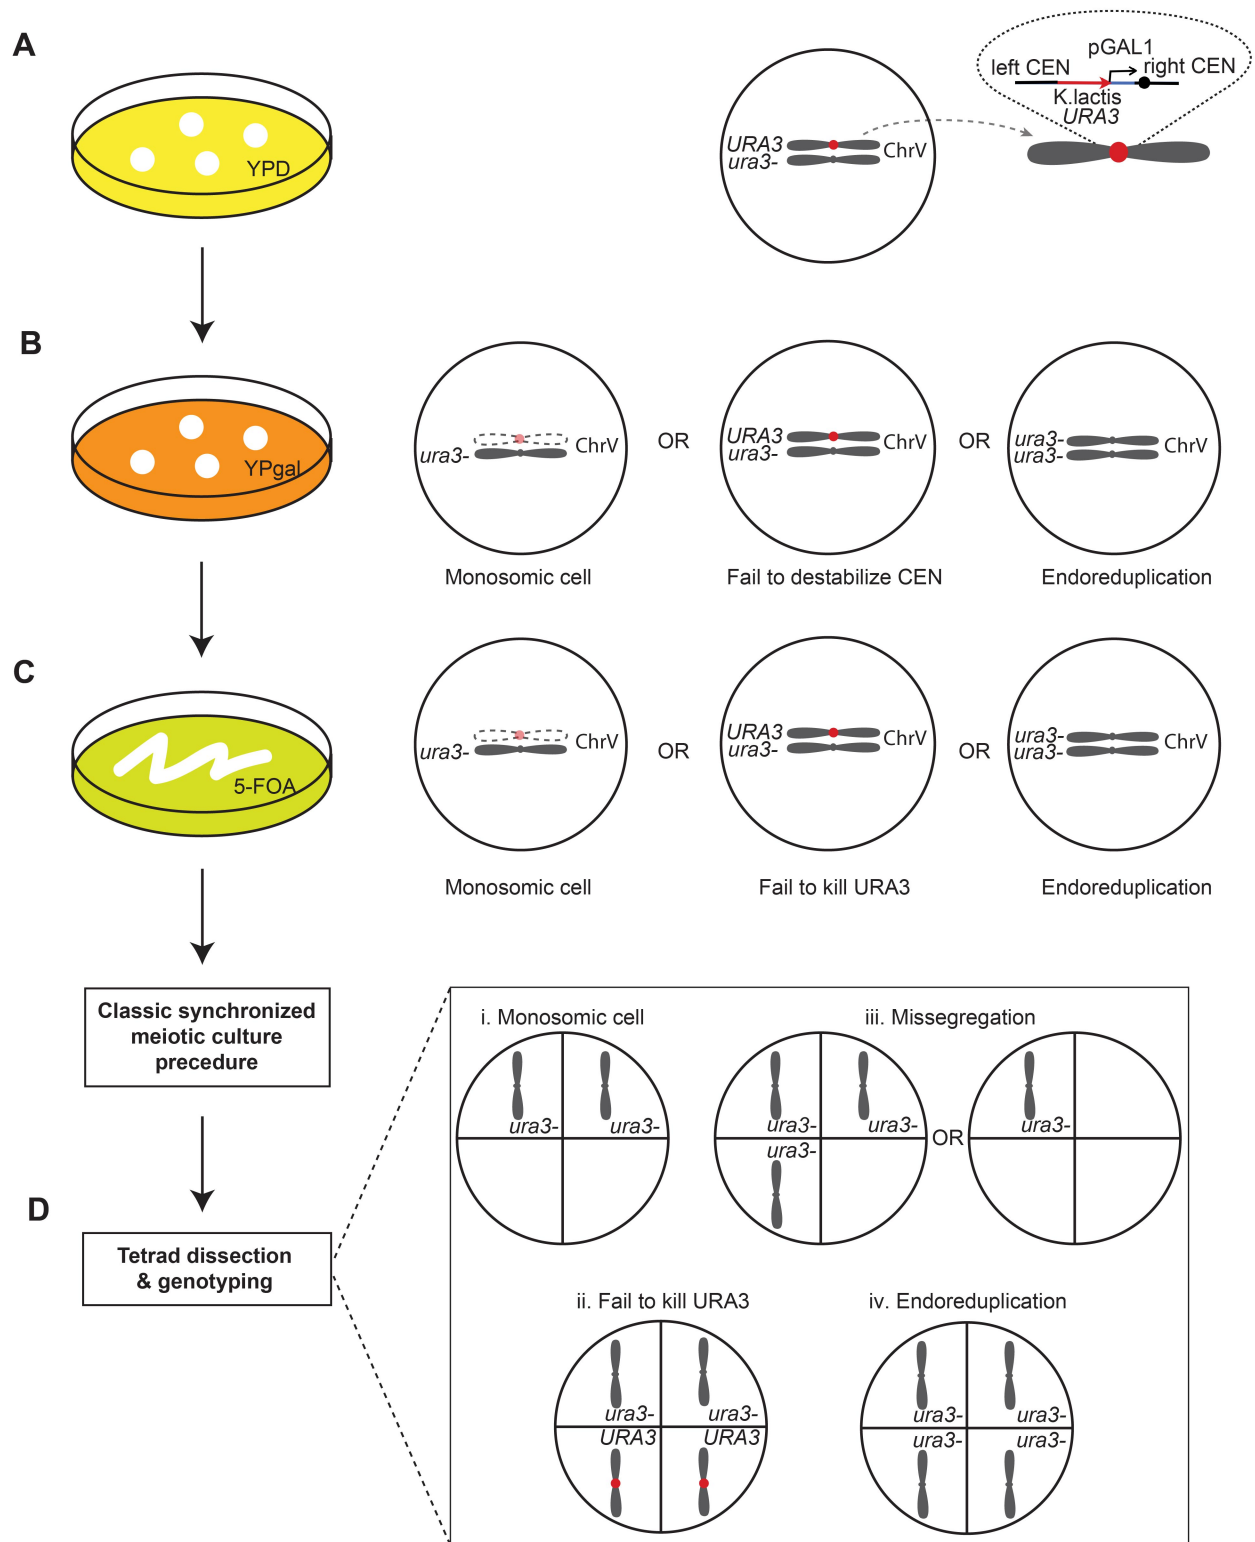

**Supplemental Figure S1. Strategy for constructing the monosomic strain.**

(A) In the diploid parental strain, one copy of chrV contains a conditional centromere generated by insertion of the *GAL1* promoter (marked with *URA3*) adjacent to the centromere. Cells are

cultivated on a YPD plate overnight before transferring to a YP galactose plate. (B) After 24 h galactose induction, most cells lose one copy of chrV due to the destabilized centromere. However, galactose induction may not be 100% efficient and some cells may have endoreduplicated the remaining copy, leading to a mixed population with different genotypes. (C) By patching cells on a 5-FOA plate, the majority of cells containing the *URA3* marker are killed, but a mixture of different cell types still potentially exists. (D) Tetrad dissection and spore genotyping after meiotic culturing are used to assess the population genotype as indicated (see **Supplemental Table S1**). i. Tetrads from monosomic cells should yield two Ura<sup>-</sup> spores and two dead spores lacking chrV. ii. Tetrads from cells that failed to destabilize the centromere and that escaped killing on 5-FOA should yield two Ura<sup>-</sup> and two Ura<sup>+</sup> spores. iii. Chromosome missegregation in monosomic or endoreduplicated cells may yield tetrads with one or three Ura<sup>-</sup> spores, respectively. iv. Endoreduplication should yield tetrads with four Ura<sup>-</sup> spores.

**A**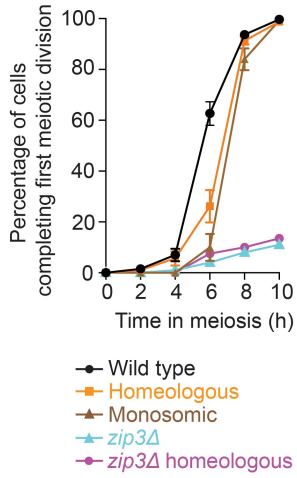**B**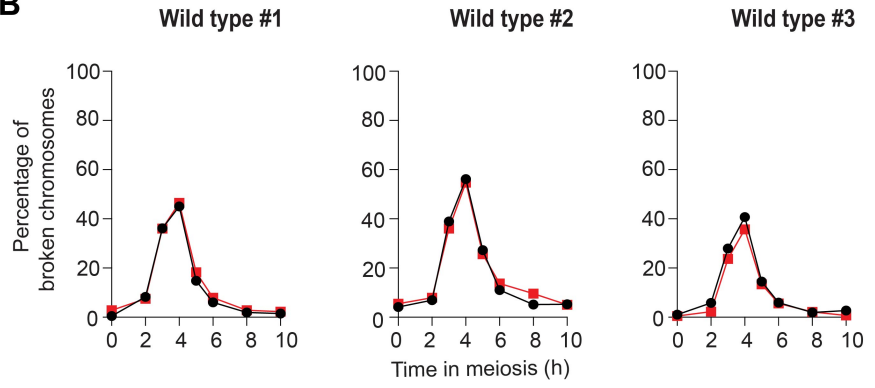**C**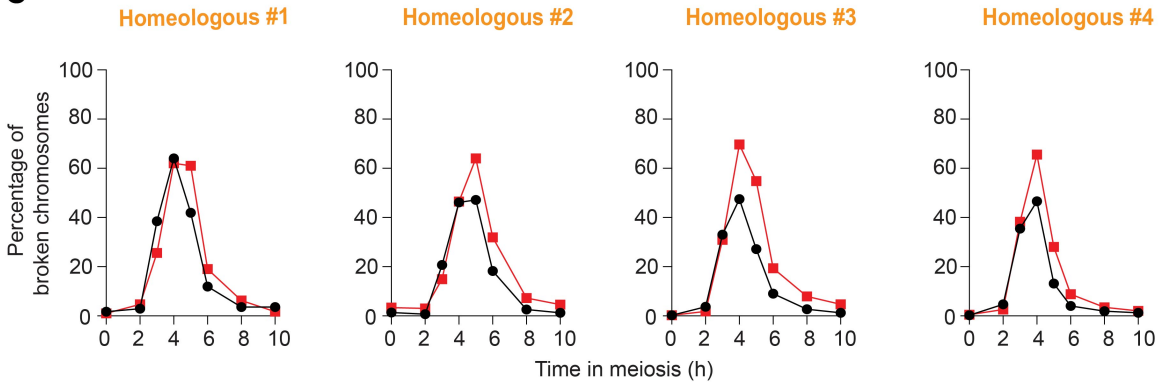**D**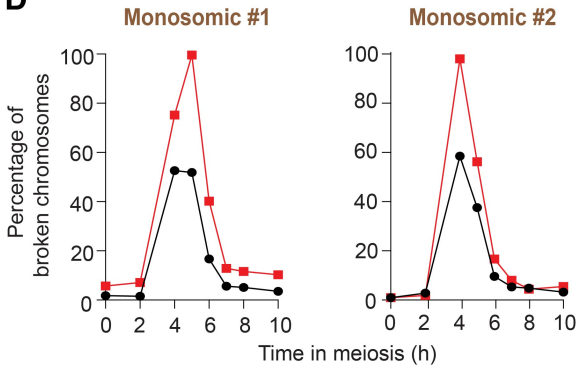**E**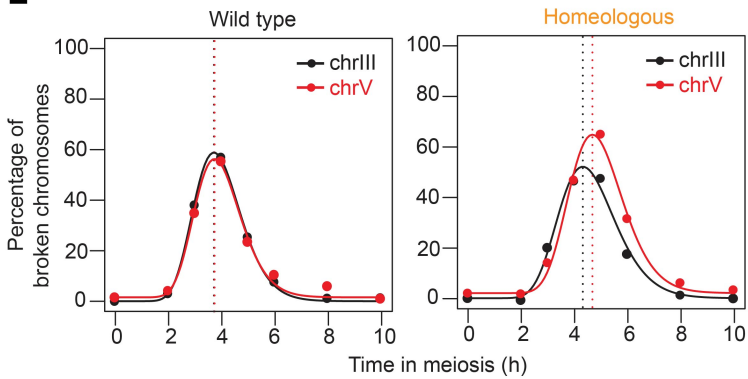**F**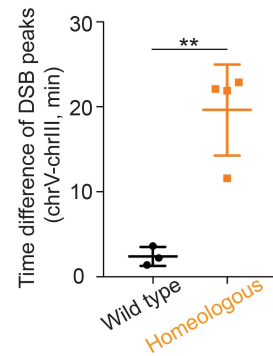

**Supplemental Figure S2. A later DSB peak on homolog-engagement-defective chromosomes.**

(A) Meiotic division timing. The graph shows the percentage of cells that completed the first division (bi- and tetra-nucleate cells).  $\geq 100$  cells were counted at each time point for each sample. Error bars are mean  $\pm$  SD for three wild type and four homeologous cultures; mean  $\pm$  range for two each of monosomic, *zip3 $\Delta$* , and *zip3 $\Delta$*  homeologous cultures. (B) Representative lognormal curves fitted to DSB time courses for chrIII and chrV in wild type and homeologous strains. (C) Quantification of DSB peak time differences after curve fitting between chrV and chrIII for wild type and homeologous strains. Each point is an independent culture; bars are mean  $\pm$  SD. \*\*  $p < 0.01$ , unpaired t test.

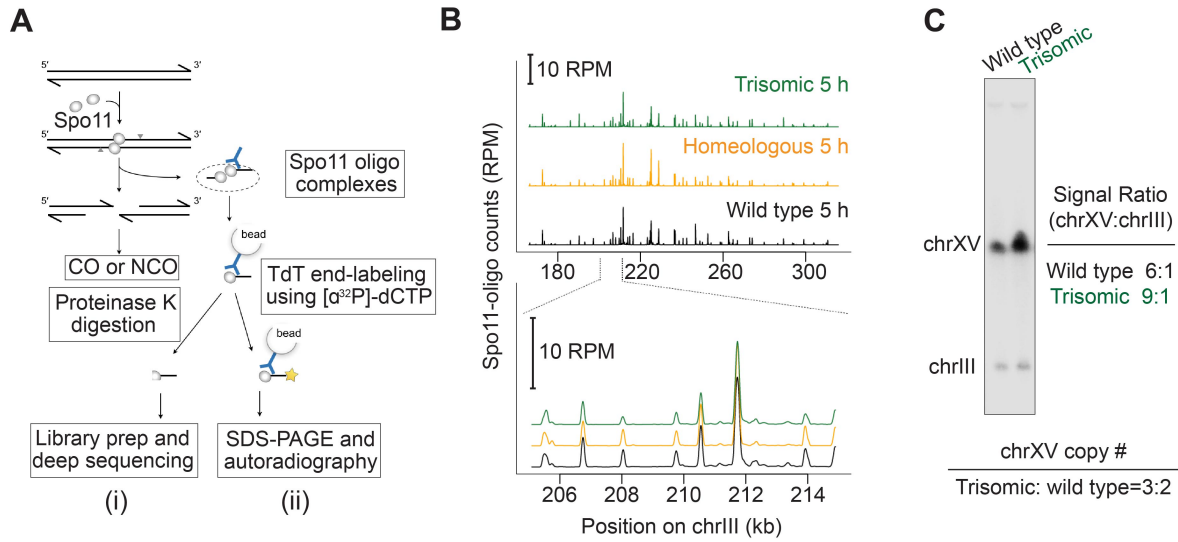

**Supplemental Figure S3. DSB mapping and quantification via analysis of Spo11-oligo complexes, and karyotypic analysis of the trisomy-XV strain.**

(A) Spo11 generates a covalent protein-linked DSB, then endonucleolytic cleavage releases Spo11 bound to short oligos. Spo11-oligo complexes can be detected by (i) Spo11-oligo mapping, in which immunoprecipitated Spo11-oligo complexes are digested with proteinase K and the released oligos are ligated to sequencing adaptors; or (ii) labeling of Spo11-oligo complexes, in which immunoprecipitated Spo11-oligo complexes are radiolabeled using terminal deoxynucleotidyl transferase and  $[\alpha\text{-}^{32}\text{P}]\text{-dCTP}$  then separated by SDS-PAGE. (B) Spo11-oligo distributions on representative regions of chrIII. RPM, reads per million mapped; profiles were smoothed with a 201-bp Hann window. (C) Genotyping by Southern blotting to detect full-length chrXV and chrIII (control) separated by PFGE.

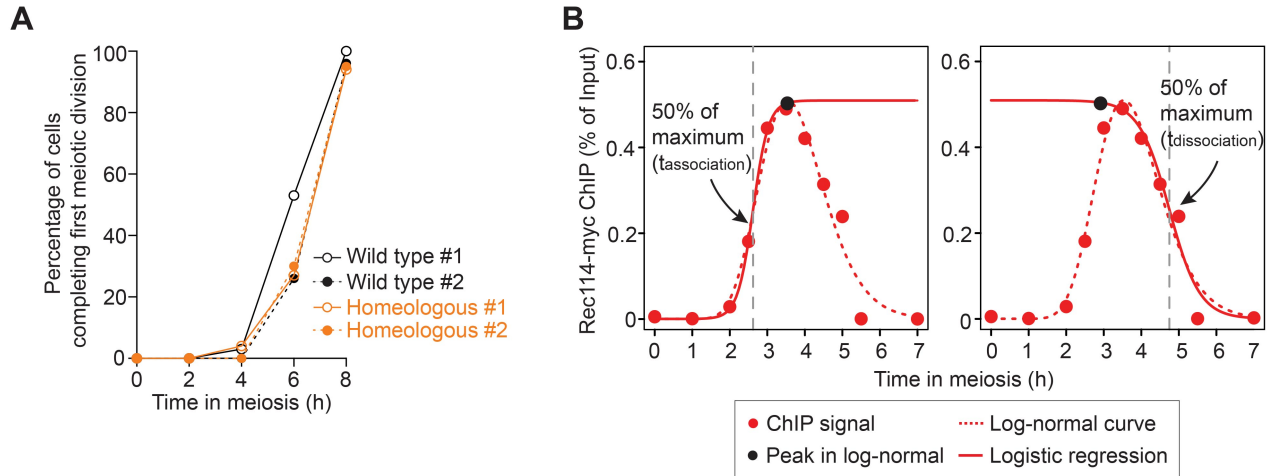

**Supplemental Figure S4. Time course analysis of Rec114 binding on homeologous chrV.**

(A) Meiotic division timing. The graph shows the percentage of cells completing the first division (total bi- and tetra-nucleate cells) for individual cultures.  $\geq 100$  cells were counted at each time point for each sample. Note that wild type culture #2 appears slightly delayed. This exemplifies normal culture-to-culture variability in absolute timing of meiotic progression, highlighting the usefulness of internally controlled experiments. (B) Illustration of two-step curve fitting for calculations of association and dissociation times. A log-normal curve (dashed line) is first fitted to all points to define the peak time and height (black circle), then two logistic curves (solid lines) are fitted (left, using early points; right, using late points);  $t_{\text{association}}$  is defined as the position where the logistic curve reaches 50% of the peak level for early points (left) and  $t_{\text{dissociation}}$  is where the logistic curve reaches 50% of the peak level for late points (right).

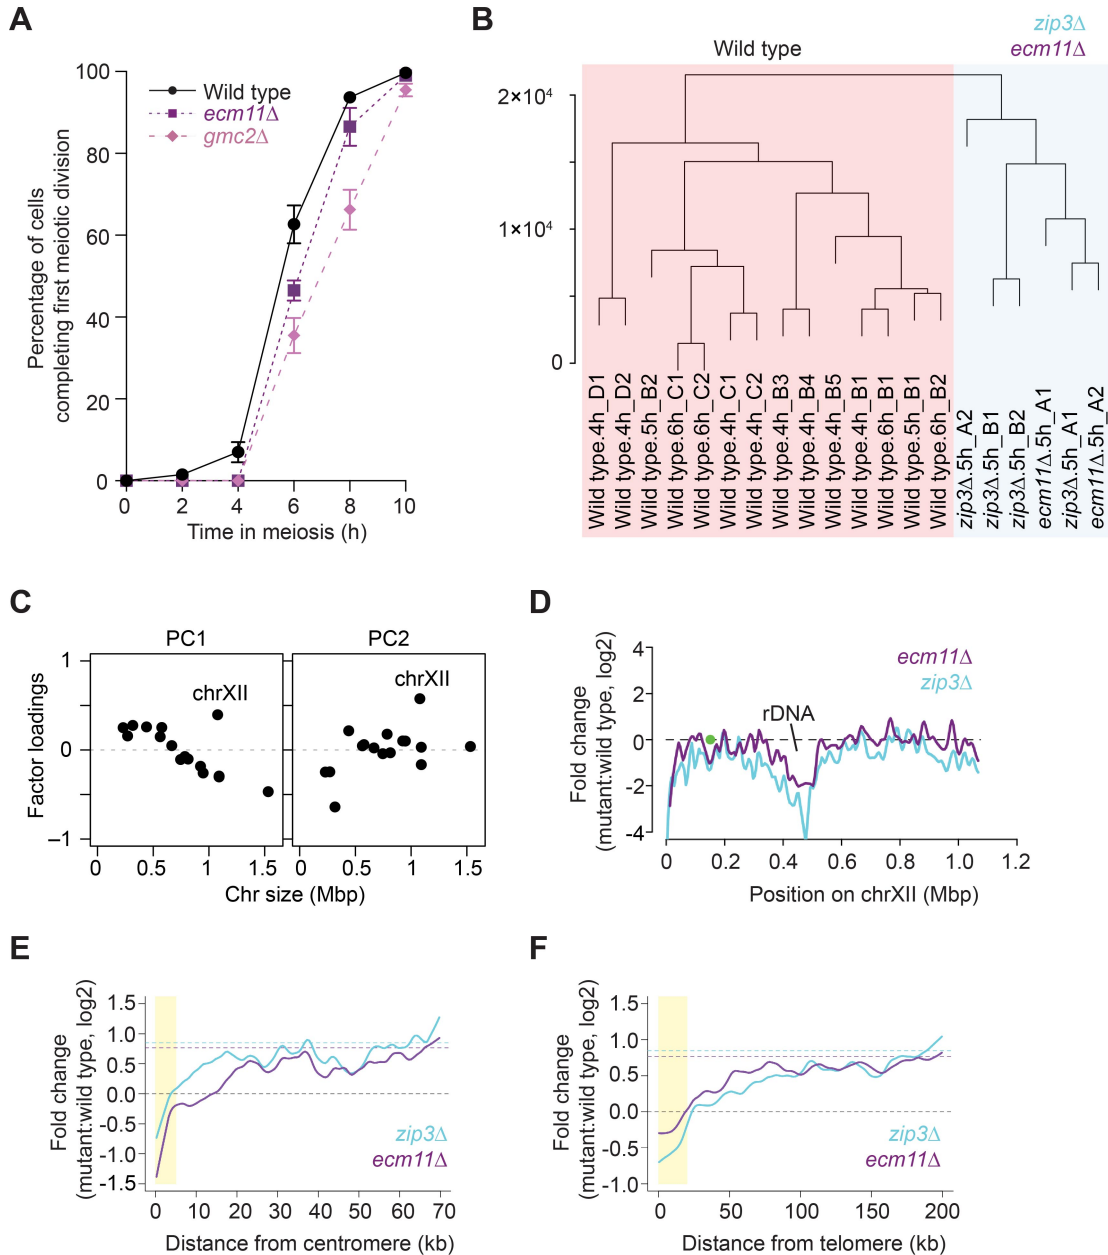

### Supplemental Figure S5. DSB patterns in *gmc2Δ* and *ecm11Δ* mutants.

(A) Meiotic division timing. The graph shows the percentage of cells completing the first divisions (total bi- and tetra-nucleate cells, mean  $\pm$  SD, 3 cultures each).  $\geq 100$  cells were counted at each time point for each culture. (B) Hierarchical clustering analysis using the “Ward D2” method for 20 wild-type and mutant maps. The y-axis represents the height of the cluster dendrogram. In the label for each data set, the letters A, B, C and D stand for maps generated by Xiaojing Mu, Neeman Mohibullah, Megan van Overbeek, and Xuan Zhu, respectively, and the numerals distinguish biological replicate maps. (C) Contributions (factor loadings) of each chromosome to PC1 and PC2 shown in **Fig. 6C**. PC1 appears to mainly capture effects of the mutations on chromosome size plus a contribution from the unique behavior of chrXII. The three shortest chromosomes and (in the opposite direction) chrXII were the greatest contributors to



PC2. The underlying source of this variation in PC2 is unclear, but as this dimension does not cleanly distinguish the data sets based on genotype (**Fig. 6C**), we speculate that PC2 is capturing culture-to-culture variability and/or experimental variability in sequencing library preparation. (D) Regional variation in response to *zip3Δ* and *ecm11Δ* mutations for chrXII. Lines, local regression (loess) based on Spo11-oligo density changes in 5 kb-bins; green circle, centromere; rDNA location is labeled. (E, F) Fold change of Spo11-oligo densities for *zip3Δ* and *ecm11Δ* compared to wild type in pericentric (E) and telomere-proximal (F) regions. Solid lines are local regression (loess) for data in 5 kb-bins averaged across 32 chromosome arms; dashed lines indicate no change in black and genome average change in cyan (1.8-fold, *zip3Δ*) and purple (1.7-fold, *ecm11Δ*); yellow shading highlights zones suppressed for DSB formation as previously defined (Pan et al. 2011).

**Supplemental Table S1. Genotyping of monosomic biological replicates**

| Event                              | Observed phenotype | No. of viable spores | Culture <sup>a</sup> |            |
|------------------------------------|--------------------|----------------------|----------------------|------------|
|                                    |                    |                      | A                    | B          |
| Failure to kill <i>URA3</i> spores | 2:2 Ura+:Ura-      | 4                    | 0 (0/13)             | 0 (0/10)   |
| Endoreduplication                  | Ura-               | 4                    | 0 (0/13)             | 0 (0/10)   |
| Monosomic chrV                     | Ura-               | 2                    | 84.6% (11/13)        | 80% (8/10) |
| Missegregation                     | Ura-               | 1 or 3               | 15.4% (2/13)         | 20% (2/10) |

<sup>a</sup> The number of dissected tetrads is indicated:

Culture A: 13 tetrads dissected in total

Culture B: 10 tetrads dissected in total

**Supplemental Table S2. Primer pairs for ChIP-qPCR**

| <b>Primer Name</b> | <b>Alias</b> | <b>Sequence</b>          | <b>Chr</b> | <b>Position</b> |
|--------------------|--------------|--------------------------|------------|-----------------|
| PP1F               | ARE1         | GAAGATAGAGTTGCTGGTGAAAG  | III        | 248737-248760   |
| PP1R               | ARE1         | TAATTGTTACCGGGTGGGTC     | III        | 248834-248853   |
| PP2F               | GAT1         | TGTGTACTIONAACCCTTTTCAGC | VI         | 89499-89521     |
| PP2R               | GAT1         | CGAAAAATAGCAACCAGGCAC    | VI         | 89488-89509     |
| PP3F               | GLY1         | TGTCGTCCGGTAGAACCTTG     | V          | 82148-82166     |
| PP3R               | GLY1         | TTCCTGGAGCGTTGGTAG       | V          | 82261-82278     |
| PP4F               | Right arm 1  | GATCCCGAACAAGTATCAGTCC   | V          | 224319-224340   |
| PP4R               | Right arm 1  | CGATGAGCTGGTCAAATCTG     | V          | 224419-224438   |
| PP5F               | Right arm 2  | AACTGCCACCTAATCGCTTC     | V          | 531194-531213   |
| PP5R               | Right arm 2  | TTCAAATGAAGCCAGGTCC      | V          | 531236-531254   |

**Supplemental Table S3. Yeast strains used in this study**

| Strain number        | Species                                                   | Genotype                                                                                                                                                                                                                                            |
|----------------------|-----------------------------------------------------------|-----------------------------------------------------------------------------------------------------------------------------------------------------------------------------------------------------------------------------------------------------|
| SKY4780              | <i>S. cerevisiae</i> SK1                                  | <i>MATa/α; ura3<sup>+</sup>; lys2<sup>+</sup>; ho::LYS2<sup>+</sup>; leu2Δ(asp718-ecoR1)/leu2Δ; arg4Δ(eco47III-hpa1)/arg4Δ-bgl; cyh2-z<sup>+</sup>; S. cerevisiae chrV: natMX/S. cerevisiae chrV; SPO11-6His-3FLAG-loxP-kanMX-loxP<sup>+</sup></i>  |
| SKY4781              | <i>S. cerevisiae</i> SK1                                  | <i>MATa/α; ura3<sup>+</sup>; lys2<sup>+</sup>; ho::LYS2<sup>+</sup>; leu2Δ(asp718-ecoR1)/leu2Δ; arg4Δ(eco47III-hpa1)/arg4Δ-bgl; cyh2-z<sup>+</sup>; S. cerevisiae chrV: natMX/S. cerevisiae chrV; SPO11-6His-3FLAG-loxP-kanMX-loxP<sup>+</sup></i>  |
| SKY4777 <sup>a</sup> | <i>S. cerevisiae</i> SK1 w/<br><i>S. pastorianus</i> chrV | <i>MATa/α; ura3<sup>+</sup>; lys2<sup>+</sup>; ho::LYS2<sup>+</sup>; leu2Δ(asp718-ecoR1)/leu2Δ; arg4Δ(eco47III-hpa1)/arg4Δ-bgl; cyh2-z<sup>+</sup>; S. pastorianus chrV: ilv1/S. cerevisiae chrV: natMX; SPO11-6His-3FLAG-loxP-kanMX-loxP/SPO11</i> |
| SKY4779 <sup>a</sup> | <i>S. cerevisiae</i> SK1 w/<br><i>S. pastorianus</i> chrV | <i>MATa/α; ura3<sup>+</sup>; lys2<sup>+</sup>; ho::LYS2<sup>+</sup>; leu2Δ(asp718-ecoR1)/leu2Δ; arg4Δ(eco47III-hpa1)/arg4Δ-bgl; cyh2-z<sup>+</sup>; S. pastorianus chrV: ilv1/S. cerevisiae chrV: natMX; SPO11-6His-3FLAG-loxP-kanMX-loxP/SPO11</i> |
| SKY4772 <sup>a</sup> | <i>S. cerevisiae</i> SK1 w/<br><i>S. pastorianus</i> chrV | <i>MATa/α; URA3/ura3; lys2<sup>+</sup>; ho::LYS2<sup>+</sup>; leu2Δ<sup>+</sup>; arg4Δ<sup>+</sup>; REC114-myc8::ura3::hphMX6<sup>+</sup>; S. pastorianus chrV: ilv1/S. cerevisiae chrV: natMX</i>                                                  |
| SKY4773              | <i>S. cerevisiae</i> SK1                                  | <i>MATa/α; URA3/ura3; lys2<sup>+</sup>; ho::LYS2<sup>+</sup>; leu2Δ<sup>+</sup>; arg4Δ<sup>+</sup>; REC114-myc8::ura3::hphMX6<sup>+</sup>; S. cerevisiae chrV: natMX/S. cerevisiae chrV</i>                                                         |
| SKY4774              | <i>S. cerevisiae</i> SK1                                  | <i>MATa/α; URA3/ura3; lys2<sup>+</sup>; ho::LYS2<sup>+</sup>; leu2Δ<sup>+</sup>; arg4Δ<sup>+</sup>; REC114-myc8::ura3::hphMX6<sup>+</sup>; S. cerevisiae chrV: natMX/S. cerevisiae chrV</i>                                                         |
| SKY4776 <sup>a</sup> | <i>S. cerevisiae</i> SK1 w/<br><i>S. pastorianus</i> chrV | <i>MATa/α; ura3<sup>+</sup>; lys2<sup>+</sup>; ho::LYS2<sup>+</sup>; leu2Δ<sup>+</sup>; arg4Δ<sup>+</sup>; REC114-myc8::ura3::hphMX6<sup>+</sup>; S. pastorianus chrV: ilv1/S. cerevisiae chrV: natMX</i>                                           |
| SKY5070 <sup>b</sup> | <i>S. cerevisiae</i> SK1                                  | <i>MATa/α; ura3<sup>+</sup>; lys2<sup>+</sup>; ho::LYS2<sup>+</sup>; arg4Δ-bgl<sup>+</sup>; leu2Δ<sup>+</sup>; GAL3<sup>+</sup>; CEN5::pGAL1-CEN5-URA3/CEN5</i>                                                                                     |
| SKY5071 <sup>b</sup> | <i>S. cerevisiae</i> SK1                                  | <i>MATa/α; ura3<sup>+</sup>; lys2<sup>+</sup>; ho::LYS2<sup>+</sup>; arg4Δ-bgl<sup>+</sup>; leu2Δ<sup>+</sup>; GAL3<sup>+</sup>; CEN5::pGAL1-CEN5-URA3/CEN5</i>                                                                                     |

|                      |                                                           |                                                                                                                                                                                                                                                                                                                                 |
|----------------------|-----------------------------------------------------------|---------------------------------------------------------------------------------------------------------------------------------------------------------------------------------------------------------------------------------------------------------------------------------------------------------------------------------|
| SKY5294 <sup>a</sup> | <i>S. cerevisiae</i> SK1 w/<br><i>S. pastorianus</i> chrV | <i>MATa/α; ura3</i> <sup>"/</sup> ; <i>lys2</i> <sup>"/</sup> ; <i>ho::LYS2</i> <sup>"/</sup> ;<br><i>leu2Δ(asp718-ecoR1)/leu2Δ; arg4Δ(eco47III-hpa1)/arg4Δ-bgl; cyh2-z</i> <sup>"/</sup> ; <i>S. pastorianus</i> chrV:<br><i>ilv1/S. cerevisiae</i> chrV: <i>natMX</i> ; <i>SPO11-6His-3FLAG-loxP-kanMX-loxP</i> <sup>"/</sup> |
| SKY5325              | <i>S. cerevisiae</i> SK1                                  | <i>MATa; ura3; lys2; ho::LYS2; leu2Δ; arg4Δ-bgl; cyh2-z; zip3Δ:hphMX; SPO11-6His-3FLAG-loxP-kanMX-loxP</i>                                                                                                                                                                                                                      |
| SKY5327              | <i>S. cerevisiae</i> SK1                                  | <i>MATα; ura3; lys2; ho::LYS2; leu2Δ; arg4Δ-bgl; cyh2-z; zip3Δ::hphMX; SPO11-6His-3FLAG-loxP-kanMX-loxP</i>                                                                                                                                                                                                                     |
| SKY5469 <sup>a</sup> | <i>S. cerevisiae</i> SK1 w/<br><i>S. pastorianus</i> chrV | <i>MATa/α; ura3</i> <sup>"/</sup> ; <i>lys2</i> <sup>"/</sup> ; <i>ho::LYS2</i> <sup>"/</sup> ; <i>leu2Δ</i> <sup>"/</sup> ;<br><i>arg4Δ(eco47III-hpa1)/arg4Δ-bgl; zip3Δ::hphMX</i> <sup>"/</sup> ; <i>S. pastorianus</i> chrV: <i>ilv1/S. cerevisiae</i> chrV: <i>natMX; SPO11-6His-3FLAG-loxP-kanMX-loxP</i> <sup>"/</sup>    |
| SKY5642              | <i>S. cerevisiae</i> SK1                                  | <i>MATa/α; ura3</i> <sup>"/</sup> ; <i>lys2</i> <sup>"/</sup> ; <i>ho::LYS2</i> <sup>"/</sup> ; <i>leu2Δ</i> <sup>"/</sup> ;<br><i>arg4Δ-bgl/arg4Δ-nsp; cyh2-z</i> <sup>"/</sup> ; <i>gmc2Δ::natMX</i> <sup>"/</sup> ;<br><i>SPO11-6His-3FLAG-loxP-kanMX-loxP</i> <sup>"/</sup>                                                 |
| SKY5643              | <i>S. cerevisiae</i> SK1                                  | <i>MATa/α; ura3</i> <sup>"/</sup> ; <i>lys2</i> <sup>"/</sup> ; <i>ho::LYS2</i> <sup>"/</sup> ; <i>leu2Δ</i> <sup>"/</sup> ;<br><i>arg4Δ-bgl/arg4Δ-nsp; cyh2-z</i> <sup>"/</sup> ; <i>gmc2Δ::natMX</i> <sup>"/</sup> ;<br><i>SPO11-6His-3FLAG-loxP-kanMX-loxP</i> <sup>"/</sup>                                                 |
| SKY5869              | <i>S. cerevisiae</i> SK1                                  | <i>MATa/α; ura3</i> <sup>"/</sup> ; <i>lys2</i> <sup>"/</sup> ; <i>ho::LYS2</i> <sup>"/</sup> ; <i>leu2Δ</i> <sup>"/</sup> ;<br><i>arg4Δ-bgl/arg4Δ-nsp; cyh2-z</i> <sup>"/</sup> ;<br><i>ecm11Δ::natMX</i> <sup>"/</sup> ; <i>SPO11-6His-3FLAG-loxP-kanMX-loxP</i> <sup>"/</sup>                                                |
| SKY5870              | <i>S. cerevisiae</i> SK1                                  | <i>MATa/α; ura3</i> <sup>"/</sup> ; <i>lys2</i> <sup>"/</sup> ; <i>ho::LYS2</i> <sup>"/</sup> ; <i>leu2Δ</i> <sup>"/</sup> ;<br><i>arg4Δ-bgl/arg4Δ-nsp; cyh2-z</i> <sup>"/</sup> ;<br><i>ecm11Δ::natMX</i> <sup>"/</sup> ; <i>SPO11-6His-3FLAG-loxP-kanMX-loxP</i> <sup>"/</sup>                                                |

<sup>a</sup> Haploid *S. cerevisiae* SK1 strain carrying *S. pastorianus* chrV from Michael Lichten

<sup>b</sup> Plasmid containing *CEN5::pGAL1-CEN5-URA3* from Rodney Rothstein

The trisomic chrXV strain arose spontaneously during normal culturing

**Supplemental Table S4. Mapping statistics for Spo11 oligo sequences**

| Dataset                            | Strain            | Time | No. of total reads | Genome mapped to                                                 | No. mapped | No. mapped uniquely            |
|------------------------------------|-------------------|------|--------------------|------------------------------------------------------------------|------------|--------------------------------|
| Homeo_1 <sup>a</sup>               | SKY5294           | 4 h  | 19,996,390         | <i>S. cerevisiae</i> S288C plus <i>S. eubayanus</i> chromosome V | 17,815,499 | 15,000,784 (98.1% of filtered) |
| Homeo_2 <sup>a</sup>               | SKY5294           | 5 h  | 33,244,263         | <i>S. cerevisiae</i> S288C plus <i>S. eubayanus</i> chromosome V | 30,836,597 | 25,837,596 (97.2% of filtered) |
| <i>zip3</i> Δ_1 <sup>b</sup>       | SKY5325 x SKY5327 | 5 h  | 34,251,244         | <i>S. cerevisiae</i> S288C                                       | 33,274,600 | 28,128,137 (98.1% of filtered) |
| <i>zip3</i> Δ_2 <sup>b</sup>       | SKY5325 x SKY5327 | 5 h  | 77,343,014         | <i>S. cerevisiae</i> S288C                                       | 75,329,644 | 67,157,785 (98.1% of filtered) |
| <i>zip3</i> Δ homeo_1 <sup>a</sup> | SKY5469           | 5 h  | 90,075,914         | <i>S. cerevisiae</i> S288C plus <i>S. eubayanus</i> chromosome V | 16,625,735 | 13,928,149 (98.0% of filtered) |
| <i>zip3</i> Δ homeo_2 <sup>a</sup> | SKY5469           | 5 h  | 7,218,891          | <i>S. cerevisiae</i> S288C plus <i>S. eubayanus</i> chromosome V | 3,796,498  | 3,356,563 (97.1% of filtered)  |
| <i>ecm11</i> Δ_1 <sup>b,*</sup>    | SKY5869           | 5 h  | 10,778,802         | <i>S. cerevisiae</i> S288C                                       | 10,648,118 | 1,435,809 (98.0% of filtered)  |
| <i>ecm11</i> Δ_2 <sup>b</sup>      | SKY5869           | 5 h  | 9,679,255          | <i>S. cerevisiae</i> S288C                                       | 8,086,230  | 7,254,361 (98.0% of filtered)  |

<sup>a</sup> One copy of chrV is from *S. pastorianus* and all other chromosomes are from the *S. cerevisiae* SK1 strain. Sequencing reads were mapped to the S288C genome (sacCer2 assembly) plus *S. eubayanus* chrV.

<sup>b</sup> Strains are *S. cerevisiae* SK1 background, mapped to the sacCer2 assembly.

\* For this sample, a synthetic oligonucleotide (TGGATCCGTGGAATAATGCACAATT) was added to increase the DNA amount during library preparation.

## Supplemental Table S5. Spo11-oligo datasets used in this study

| Source<br>(accession number)                                      | Dataset<br>as shown at GEO                     | Alias used in<br>Supplemental<br>Figure S5 | Time            | Tag  | Figures            |       |
|-------------------------------------------------------------------|------------------------------------------------|--------------------------------------------|-----------------|------|--------------------|-------|
| <b>Thacker et al. 2014</b><br><br>(GSE48299)                      | WT_1                                           | Wild type.4h_B3                            | 4 h             | PrA  | 3, 4 and 6; S5     |       |
|                                                                   | WT_2                                           | Wild type.4h_B4                            | 4 h             | PrA  | 3, 4 and 6; S5     |       |
|                                                                   | zip3_1                                         | zip3Δ.5h_B1                                | 5 h             | PrA  | 6; S5              |       |
|                                                                   | zip3_2                                         | zip3Δ.5h_B2                                | 5 h             | PrA  | 6; S5              |       |
| <b>Mohibullah</b><br><br><b>and Keeney 2017</b><br><br>(GSE84696) | wt4_1                                          | Wild type.4h_B1                            | 4 h             | PrA  | 2 and 6; S5        |       |
|                                                                   | wt4_2                                          | Wild type.4h_B5                            | 4 h             | PrA  | 6; S5              |       |
|                                                                   | wt5_1                                          | Wild type.5h_B1                            | 5 h             | PrA  | 2 and 6; S3 and S5 |       |
|                                                                   | wt5_2                                          | Wild type.5h_B2                            | 5 h             | PrA  | 6; S5              |       |
|                                                                   | wt6_1                                          | Wild type.6h_B1                            | 6 h             | PrA  | 2 and 6; S5        |       |
|                                                                   | wt6_2                                          | Wild type.6h_B2                            | 6 h             | PrA  | 6; S5              |       |
|                                                                   | <b>Murakami et al. 2020</b><br><br>(GSE119689) | wt_a_4h                                    | Wild type.4h_C1 | 4 h  | flag               | 6; S5 |
|                                                                   |                                                | wt_b_4h                                    | Wild type.4h_C2 | 4 h  | flag               | 6; S5 |
| wt_a_6h                                                           |                                                | Wild type.6h_C1                            | 6 h             | flag | 6; S5              |       |
| wt_b_6h                                                           |                                                | Wild type.6h_C2                            | 6 h             | flag | 6; S5              |       |

|                                |                    |                     |     |      |                |
|--------------------------------|--------------------|---------------------|-----|------|----------------|
| <b>Zhu and Keeney<br/>2015</b> | WT_1               | Wild type.4h_D1     | 4 h | flag | 6; S5          |
| <b>(GSE67910)</b>              | WT_2               | Wild type.4h_D2     | 4 h | flag | 6; S5          |
| <b>This study</b>              | SK1_homeologous_4h |                     | 4 h | flag | 2 and 6        |
| <b>(GSE152957)</b>             | SK1_homeologous_5h |                     | 5 h | flag | 2, 3 and 6; S3 |
|                                | SK1_zip3Δ_1        | <i>zip3Δ.5h_A1</i>  | 5 h | flag | 4 and 6; S5    |
|                                | SK1_zip3Δ_2        | <i>zip3Δ.5h_A2</i>  | 4 h | flag | 4 and 6; S5    |
|                                | SK1_zip3Δ homeo_1  |                     | 5 h | flag | 4 and 6        |
|                                | SK1_zip3Δ homeo_2  |                     | 5 h | flag | 4 and 6        |
|                                | SK1_ecm11Δ_1       | <i>ecm11Δ.5h_A1</i> | 5 h | flag | 6; S5          |
|                                | SK1_ecm11Δ_2       | <i>ecm11Δ.5h_A2</i> | 5 h | flag | 6; S5          |
|                                | SK1_trisomic_4h    |                     | 4 h | PrA  | 2              |
|                                | SK1_trisomic_5h    |                     | 5 h | PrA  | 2 and 3; S3    |
|                                | SK1_trisomic_6h    |                     | 6 h | PrA  | 2              |
